# Supplementary material
Source: ML conference proceedings conference paper supplement (https://openreview.net/forum?id=Q8cVivO5k5)
Supplement: supplementary_material [file attachment]

# Using LBN-MOBO with aleatoric uncertainty

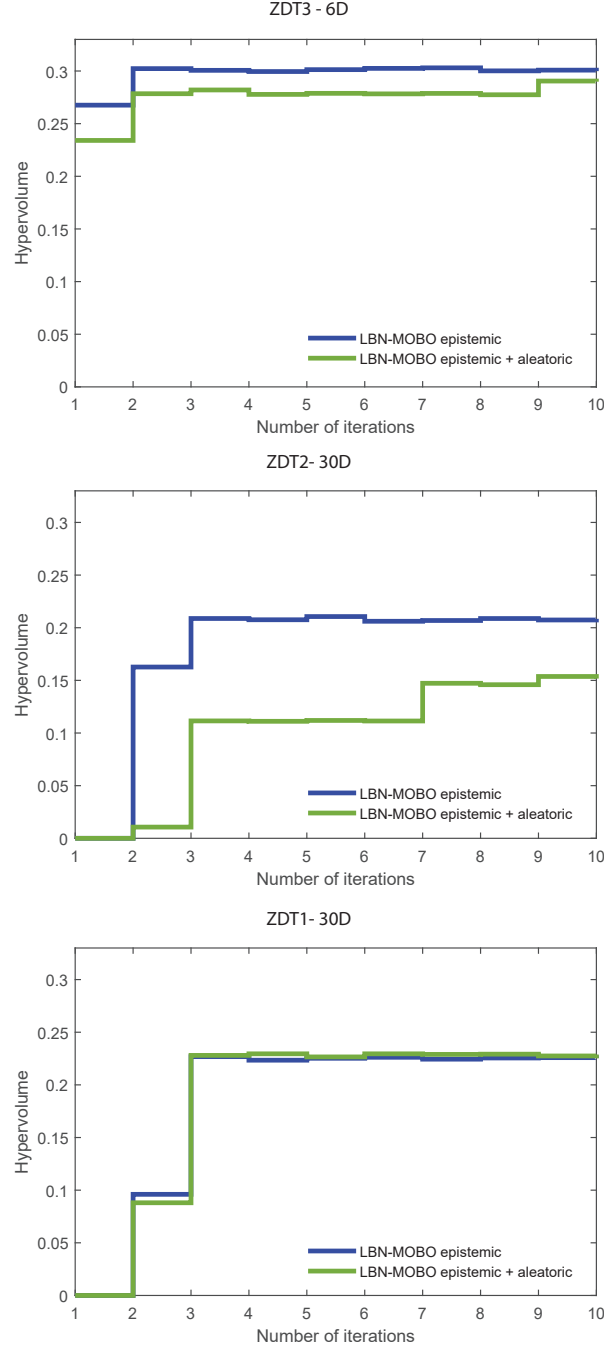

Figure 1: We ran the experiments from Sections C1.4 and C1.5 again, but this time we included calculations for aleatoric uncertainty as well as epistemic uncertainty. As evident from the results using the aleatoric uncertainty during the exploration not only does not improve the results but in some cases it also delays the convergence. It is mainly due to the nature of the aleatoric uncertainty that is an indication of the existence of the irreducible noise and is not a good measure for exploitative purposes. The batch size in all the experiments is fixed to 1000 samples.
